# Supplementary material
Source: ML conference proceedings conference paper supplement (https://aclanthology.org/W18-3407)
Supplement: Notes [file W18-3407.Notes.pdf]

# Supplementary material for Domain Adapted Word Embeddings for Improved Sentiment Classification

Prathusha K Sarma, Yingyu Liang and William A Sethares

University of Wisconsin-Madison  
 {kameswarasar, sethares}@wisc.edu,  
 yliang@cs.wisc.edu

## 1 Derivation of $\alpha$ for minimizing cluster variance.

A domain adapted word embedding  $\mathbf{w}_{i,DA}$  is then obtained as  $\hat{\mathbf{w}}_{i,DA} = \alpha \bar{\mathbf{w}}_{i,DS} + (1 - \alpha) \bar{\mathbf{w}}_{i,G}$ .

Assume each document  $d_i$  is expressed as the sum of word embeddings in the document, then we have,

$$d_i = \sum_{j=1}^n \hat{\mathbf{w}}_j$$

$$d_i = \sum_{j=1}^n (\bar{\mathbf{w}}_{j,G} + \alpha(\bar{\mathbf{w}}_{j,DS} - \bar{\mathbf{w}}_{j,G}))$$

$$d_i = d_{g_i} + \alpha \bar{d}_i.$$

Now let us assume we have  $N$  documents out of which  $k$  are positive. We can express every positive document as  $d_{p_i} = d_{g_{p_i}} + \alpha \bar{d}_{p_i}$ . Similarly we can express negative documents as  $d_n = d_{g_n} + \alpha \bar{d}_n$ . We can calculate the center of each cluster as follows to get,

$$\mu_p = \frac{1}{k} \sum_{i=1}^k (d_{p_i})$$

$$\mu_p = \frac{1}{k} \sum_{i=1}^k (d_{g_{p_i}} + \alpha \bar{d}_{p_i})$$

$$\mu_p = \hat{\mu}_p + \alpha \bar{\mu}_p$$

where,  $\bar{\mu}_p = \frac{1}{k} \sum_{i=1}^k \bar{d}_{p_i}$  and  $\hat{\mu}_p = \frac{1}{k} \sum_{i=1}^k d_{g_{p_i}}$ . Similarly we can get the negative cluster center  $\mu_n = \hat{\mu}_n + \alpha \bar{\mu}_n$  with  $\bar{\mu}_n = \frac{1}{N-k} \sum_{i=1}^{N-k} \bar{d}_n$  and  $\hat{\mu}_n = \frac{1}{N-k} \sum_{i=1}^{N-k} d_{g_n}$ .

One way to determine  $\alpha$  is by selecting  $\alpha$  such that the two document clusters are tightly packed, i.e the variance within each cluster is minimized. This can be cast as the following optimization

problem,

$$\min_{\alpha} = \frac{1}{k} \sum_{i=1}^k \|d_{p_i} - \mu_p\|_2^2 + \frac{1}{N-k} \sum_{i=1}^{N-k} \|d_{n_i} - \mu_n\|_2^2,$$

$$\min_{\alpha} = \frac{1}{k} \sum_{i=1}^k \|(d_{g_{p_i}} - \hat{\mu}_p) - \alpha(\bar{\mu}_p - \bar{d}_{p_i})\|_2^2 + \frac{1}{N-k} \sum_{i=1}^{N-k} \|(d_{g_n} - \hat{\mu}_n) - \alpha(\bar{\mu}_n - \bar{d}_n)\|_2^2,$$

$$\min_{\alpha} = \frac{1}{k} \left[ -2\alpha(d_{g_{p_i}} - \hat{\mu}_p)^\top (\bar{\mu}_p - \bar{d}_{p_i}) + \alpha^2(\bar{\mu}_p - \bar{d}_{p_i})^\top (\bar{\mu}_p - \bar{d}_{p_i}) \right] + \frac{1}{N-k} \left[ -2\alpha(d_{g_n} - \hat{\mu}_n)^\top (\bar{\mu}_n - \bar{d}_n) + \alpha^2(\bar{\mu}_n - \bar{d}_n)^\top (\bar{\mu}_n - \bar{d}_n) \right]$$

Solving this optimization problem for  $\alpha$  we get,

$$\alpha = \frac{\frac{1}{k} \sum_{i=1}^k (d_{g_{p_i}} - \hat{\mu}_p)^\top (\bar{\mu}_p - \bar{d}_{p_i}) + \frac{1}{N-k} \sum_{i=1}^{N-k} (d_{g_n} - \hat{\mu}_n)^\top (\bar{\mu}_n - \bar{d}_n)}{\frac{1}{k} \sum_{i=1}^k (\bar{\mu}_p - \bar{d}_{p_i})^\top (\bar{\mu}_p - \bar{d}_{p_i}) + \frac{1}{N-k} \sum_{i=1}^{N-k} (\bar{\mu}_n - \bar{d}_n)^\top (\bar{\mu}_n - \bar{d}_n)}$$

Finally,  $\alpha = \max(0, \min(\alpha, 1))$ .

## 2 Dimensions of word embeddings

Dimensions of generic, DS and DA embeddings used in experiments is provided in the table below.

| Word embedding     | Dimension |
|--------------------|-----------|
| GloVe              | 100       |
| word2vec           | 300       |
| LSA                | 70        |
| CCA-DA             | 68        |
| KCCA-DA            | 68        |
| GloVe common crawl | 300       |
| KCCA-DA(GlvCC)     | 300       |
| concSVD            | 300       |

Table 1: This table presents the average dimensions of LSA, generic and DA word embeddings.
